# Supplementary material for: Characterization of transcriptional landscape in bone marrow-derived mesenchymal stromal cells treated with aspirin by RNA-seq
Source: PeerJ. 2022 Jan 24;10:e12819. doi: 10.7717/peerj.12819 (PMC8793730; doi:10.7717/peerj.12819)
Supplement: Supplemental Information 7 [file peerj-10-12819-s007.xls]

## Sheet: p5vsp5+AGOBP
GO_P Term ID	GO_P Term Desc	GO_P Term Level1	GO_P Term Level2	Term Candidate Gene Num	Total Candidate Gene Num	Term Gene Num	Total Gene Num	Rich Ratio	P value	Q value
GO:0030199	collagen fibril organization	biological_process	cellular process	20	1194	42	20061	0.47619	3.8949e-14	1.75076e-10
GO:0007155	cell adhesion	biological_process	biological adhesion	68	1194	487	20061	0.13963	4.37665e-11	1.9673e-07
GO:0016477	cell migration	biological_process	locomotion	37	1194	214	20061	0.172897	4.2879e-09	1.92741e-05
GO:0042060	wound healing	biological_process	response to stimulus	27	1194	127	20061	0.212598	5.76689e-09	2.59222e-05
GO:0008285	negative regulation of cell proliferation	biological_process	regulation of biological process	51	1194	365	20061	0.139726	1.17752e-08	5.29294e-05
GO:0030198	extracellular matrix organization	biological_process	cellular process	25	1194	119	20061	0.210084	2.69864e-08	0.000121304
GO:0001666	response to hypoxia	biological_process	response to stimulus	42	1194	280	20061	0.15	3.00972e-08	0.000135287
GO:0045766	positive regulation of angiogenesis	biological_process	developmental process	26	1194	132	20061	0.19697	5.7496e-08	0.000258444
GO:0006888	ER to Golgi vesicle-mediated transport	biological_process	localization	24	1194	119	20061	0.201681	1.15623e-07	0.000519727
GO:0030335	positive regulation of cell migration	biological_process	regulation of biological process	36	1194	233	20061	0.154506	1.36057e-07	0.000611575
GO:0007568	aging	biological_process	developmental process	48	1194	366	20061	0.131148	2.24836e-07	0.00101064
GO:0016192	vesicle-mediated transport	biological_process	localization	34	1194	225	20061	0.151111	5.12655e-07	0.00230438
GO:0070301	cellular response to hydrogen peroxide	biological_process	response to stimulus	19	1194	86	20061	0.22093	5.44629e-07	0.00244811
GO:0030324	lung development	biological_process	developmental process	23	1194	120	20061	0.191667	5.50137e-07	0.00247286
GO:0071260	cellular response to mechanical stimulus	biological_process	response to stimulus	21	1194	103	20061	0.203883	5.83837e-07	0.00262435
GO:0032355	response to estradiol	biological_process	response to stimulus	34	1194	227	20061	0.14978	6.32435e-07	0.00284279
GO:0042493	response to drug	biological_process	response to stimulus	63	1194	556	20061	0.113309	6.70473e-07	0.00301378
GO:0008284	positive regulation of cell proliferation	biological_process	regulation of biological process	63	1194	560	20061	0.1125	8.58269e-07	0.00385792
GO:0043066	negative regulation of apoptotic process	biological_process	regulation of biological process	63	1194	565	20061	0.111504	1.16271e-06	0.00522637
GO:0015031	protein transport	biological_process	localization	55	1194	470	20061	0.117021	1.26844e-06	0.00570162
GO:0007160	cell-matrix adhesion	biological_process	biological adhesion	19	1194	91	20061	0.208791	1.36287e-06	0.00612612
GO:0000902	cell morphogenesis	biological_process	developmental process	17	1194	76	20061	0.223684	1.77641e-06	0.00798498
GO:0036120	cellular response to platelet-derived growth factor stimulus	biological_process	cellular process	11	1194	33	20061	0.333333	1.8195e-06	0.00817866
GO:0032868	response to insulin	biological_process	response to stimulus	21	1194	113	20061	0.185841	2.84447e-06	0.0127859
GO:0045773	positive regulation of axon extension	biological_process	developmental process	12	1194	41	20061	0.292683	2.94585e-06	0.0132416
GO:0001558	regulation of cell growth	biological_process	regulation of biological process	16	1194	71	20061	0.225352	3.20812e-06	0.0144205
GO:0006890	retrograde vesicle-mediated transport, Golgi to ER	biological_process	localization	14	1194	56	20061	0.25	3.56581e-06	0.0160283
GO:0032967	positive regulation of collagen biosynthetic process	biological_process	metabolic process	10	1194	29	20061	0.344828	3.79635e-06	0.0170646
GO:0009749	response to glucose	biological_process	response to stimulus	20	1194	106	20061	0.188679	3.82511e-06	0.0171939
GO:0032963	collagen metabolic process	biological_process	metabolic process	7	1194	14	20061	0.5	6.16107e-06	0.027694
GO:0050731	positive regulation of peptidyl-tyrosine phosphorylation	biological_process	positive regulation of biological process	18	1194	92	20061	0.195652	6.78827e-06	0.0305133
GO:0071364	cellular response to epidermal growth factor stimulus	biological_process	cellular process	15	1194	67	20061	0.223881	7.05747e-06	0.0317233
GO:0010634	positive regulation of epithelial cell migration	biological_process	regulation of biological process	10	1194	31	20061	0.322581	7.53566e-06	0.0338728
GO:0009612	response to mechanical stimulus	biological_process	response to stimulus	20	1194	111	20061	0.18018	7.93697e-06	0.0356767
GO:0010628	positive regulation of gene expression	biological_process	biological regulation	50	1194	439	20061	0.113895	8.1635e-06	0.0366949
GO:0043627	response to estrogen	biological_process	response to stimulus	20	1194	112	20061	0.178571	9.12947e-06	0.041037
GO:0001525	angiogenesis	biological_process	developmental process	28	1194	191	20061	0.146597	9.1322e-06	0.0410492
GO:0007420	brain development	biological_process	developmental process	40	1194	323	20061	0.123839	9.22596e-06	0.0414707
GO:0043086	negative regulation of catalytic activity	biological_process	biological regulation	13	1194	53	20061	0.245283	9.92931e-06	0.0446323
GO:0071230	cellular response to amino acid stimulus	biological_process	response to stimulus	14	1194	61	20061	0.229508	1.04597e-05	0.0470164
GO:0051016	barbed-end actin filament capping	biological_process	regulation of biological process	7	1194	15	20061	0.466667	1.09573e-05	0.0492529
GO:0005515	protein binding	molecular_function	binding	232	1128	1777	19033	0.130557	1.67232e-32	2.04358e-29
GO:0005178	integrin binding	molecular_function	binding	39	1128	120	19033	0.325	3.94183e-19	4.81692e-16
GO:0008201	heparin binding	molecular_function	binding	32	1128	150	19033	0.213333	1.84808e-10	2.25835e-07
GO:0042802	identical protein binding	molecular_function	binding	113	1128	1055	19033	0.107109	4.59951e-10	5.6206e-07
GO:0005518	collagen binding	molecular_function	binding	20	1128	65	19033	0.307692	5.31661e-10	6.4969e-07
GO:0019904	protein domain specific binding	molecular_function	binding	50	1128	329	19033	0.151976	7.90197e-10	9.65621e-07
GO:0019901	protein kinase binding	molecular_function	binding	64	1128	499	19033	0.128257	4.3944e-09	5.36995e-06
GO:0005201	extracellular matrix structural constituent	molecular_function	structural molecule activity	18	1128	61	19033	0.295082	8.18857e-09	1.00064e-05
GO:0005520	insulin-like growth factor binding	molecular_function	binding	11	1128	24	19033	0.458333	3.68477e-08	4.50278e-05
GO:0051015	actin filament binding	molecular_function	binding	34	1128	205	19033	0.165854	4.6629e-08	5.69806e-05
GO:0000166	nucleotide binding	molecular_function	binding	129	1128	1365	19033	0.0945055	6.11783e-08	7.47599e-05
GO:0003723	RNA binding	molecular_function	binding	94	1128	922	19033	0.101952	1.5526e-07	0.000189728
GO:0044877	protein-containing complex binding	molecular_function	binding	56	1128	455	19033	0.123077	1.67614e-07	0.000204825
GO:0003779	actin binding	molecular_function	binding	46	1128	355	19033	0.129577	4.94688e-07	0.000604508
GO:0048407	platelet-derived growth factor binding	molecular_function	binding	7	1128	11	19033	0.636364	6.74018e-07	0.00082365
GO:0050840	extracellular matrix binding	molecular_function	binding	11	1128	31	19033	0.354839	8.50563e-07	0.00103939
GO:0046982	protein heterodimerization activity	molecular_function	binding	65	1128	607	19033	0.107084	2.67627e-06	0.0032704
GO:0005509	calcium ion binding	molecular_function	binding	74	1128	732	19033	0.101093	4.59634e-06	0.00561672
GO:0031625	ubiquitin protein ligase binding	molecular_function	binding	39	1128	313	19033	0.124601	9.23507e-06	0.0112853
GO:0046332	SMAD binding	molecular_function	binding	13	1128	56	19033	0.232143	1.80084e-05	0.0220062
GO:0001968	fibronectin binding	molecular_function	binding	9	1128	28	19033	0.321429	2.1621e-05	0.0264209
GO:0002020	protease binding	molecular_function	binding	18	1128	101	19033	0.178218	2.4439e-05	0.0298645
GO:0043236	laminin binding	molecular_function	binding	9	1128	29	19033	0.310345	2.97085e-05	0.0363038
GO:0019838	growth factor binding	molecular_function	binding	11	1128	44	19033	0.25	3.78095e-05	0.0462032
GO:0005737	cytoplasm	cellular_component	cell	515	1222	5897	21212	0.0873325	9.15467e-29	7.34204e-26
GO:0009986	cell surface	cellular_component	cell part	96	1222	604	21212	0.15894	7.35243e-20	5.89665e-17
GO:0048471	perinuclear region of cytoplasm	cellular_component	cell part	102	1222	726	21212	0.140496	3.73593e-17	2.99621e-14
GO:0031012	extracellular matrix	cellular_component	extracellular region part	54	1222	260	21212	0.207692	1.13035e-16	9.06544e-14
GO:0062023	collagen-containing extracellular matrix	cellular_component	extracellular region part	32	1222	103	21212	0.31068	1.22239e-15	9.80357e-13
GO:0005604	basement membrane	cellular_component	extracellular region part	33	1222	111	21212	0.297297	1.87851e-15	1.50657e-12
GO:0005615	extracellular space	cellular_component	extracellular region part	150	1222	1433	21212	0.104676	3.61242e-13	2.89716e-10
GO:0042470	melanosome	cellular_component	organelle	28	1222	98	21212	0.285714	7.56098e-13	6.0639e-10
GO:0005829	cytosol	cellular_component	cell part	296	1222	3521	21212	0.084067	1.30691e-12	1.04815e-09
GO:0032991	protein-containing complex	cellular_component	protein-containing complex	95	1222	781	21212	0.121639	3.3101e-12	2.6547e-09
GO:0005794	Golgi apparatus	cellular_component	organelle	122	1222	1116	21212	0.109319	4.19692e-12	3.36593e-09
GO:0005581	collagen trimer	cellular_component	protein-containing complex	23	1222	72	21212	0.319444	6.48205e-12	5.1986e-09
GO:0005856	cytoskeleton	cellular_component	organelle	89	1222	754	21212	0.118037	8.21531e-11	6.58868e-08
GO:0043209	myelin sheath	cellular_component	cell part	37	1222	196	21212	0.188776	1.38635e-10	1.11185e-07
GO:0005764	lysosome	cellular_component	organelle	49	1222	329	21212	0.148936	9.55499e-10	7.6631e-07
GO:0005783	endoplasmic reticulum	cellular_component	organelle	126	1222	1276	21212	0.0987461	1.44204e-09	1.15651e-06
GO:0043025	neuronal cell body	cellular_component	cell	74	1222	620	21212	0.119355	2.08065e-09	1.66868e-06
GO:1990904	ribonucleoprotein complex	cellular_component	protein-containing complex	33	1222	180	21212	0.183333	2.95933e-09	2.37338e-06
GO:0016363	nuclear matrix	cellular_component	cell	23	1222	103	21212	0.223301	1.59489e-08	1.2791e-05
GO:0000139	Golgi membrane	cellular_component	membrane	52	1222	397	21212	0.130982	2.64346e-08	2.12005e-05
GO:0042383	sarcolemma	cellular_component	membrane	26	1222	133	21212	0.195489	3.5509e-08	2.84782e-05
GO:0005925	focal adhesion	cellular_component	cell junction	34	1222	212	21212	0.160377	5.62673e-08	4.51264e-05
GO:0043231	intracellular membrane-bounded organelle	cellular_component	organelle	86	1222	825	21212	0.104242	6.51673e-08	5.22642e-05
GO:0030496	midbody	cellular_component	cell part	28	1222	161	21212	0.173913	1.46473e-07	0.000117471
GO:0005911	cell-cell junction	cellular_component	cell junction	29	1222	172	21212	0.168605	1.75971e-07	0.000141129
GO:0005576	extracellular region	cellular_component	extracellular region	135	1222	1524	21212	0.0885827	2.76847e-07	0.000222031
GO:0045121	membrane raft	cellular_component	membrane	40	1222	297	21212	0.13468	5.0967e-07	0.000408756
GO:0045202	synapse	cellular_component	synapse	67	1222	630	21212	0.106349	9.39916e-07	0.000753813
GO:0031252	cell leading edge	cellular_component	cell part	15	1222	62	21212	0.241935	1.68349e-06	0.00135016
GO:0005768	endosome	cellular_component	cell part	52	1222	453	21212	0.11479	1.71585e-06	0.00137611
GO:0005654	nucleoplasm	cellular_component	organelle part	173	1222	2140	21212	0.0808411	2.1369e-06	0.0017138
GO:0098978	glutamatergic synapse	cellular_component	synapse	53	1222	474	21212	0.111814	3.00336e-06	0.0024087
GO:0005789	endoplasmic reticulum membrane	cellular_component	organelle	71	1222	709	21212	0.100141	3.9471e-06	0.00316557
GO:0043005	neuron projection	cellular_component	cell part	58	1222	542	21212	0.107011	4.15457e-06	0.00333197
GO:0036464	cytoplasmic ribonucleoprotein granule	cellular_component	cell part	15	1222	67	21212	0.223881	4.76909e-06	0.00382481
GO:0030126	COPI vesicle coat	cellular_component	organelle	7	1222	14	21212	0.5	4.96534e-06	0.0039822
GO:0005765	lysosomal membrane	cellular_component	membrane	25	1222	162	21212	0.154321	6.31829e-06	0.00506727
GO:0030424	axon	cellular_component	cell part	51	1222	462	21212	0.11039	6.60551e-06	0.00529762
GO:0015629	actin cytoskeleton	cellular_component	cell part	27	1222	185	21212	0.145946	7.97511e-06	0.00639604
GO:0014704	intercalated disc	cellular_component	cell junction	13	1222	54	21212	0.240741	8.73532e-06	0.00700572
GO:0005588	collagen type V trimer	cellular_component	extracellular region part	4	1222	4	21212	1	1.09634e-05	0.00879268
GO:0030663	COPI-coated vesicle membrane	cellular_component	membrane	6	1222	11	21212	0.545455	1.2982e-05	0.0104116
GO:0030027	lamellipodium	cellular_component	cell part	25	1222	170	21212	0.147059	1.49268e-05	0.0119713
GO:0097060	synaptic membrane	cellular_component	cell part	12	1222	49	21212	0.244898	1.59997e-05	0.0128317
GO:0070062	extracellular exosome	cellular_component	organelle	27	1222	194	21212	0.139175	1.92546e-05	0.0154422
GO:0005634	nucleus	cellular_component	organelle	414	1222	6070	21212	0.0682043	2.06314e-05	0.0165464
GO:0008305	integrin complex	cellular_component	membrane	9	1222	29	21212	0.310345	2.37803e-05	0.0190718
GO:0005790	smooth endoplasmic reticulum	cellular_component	organelle	9	1222	30	21212	0.3	3.2242e-05	0.0258581
GO:0032154	cleavage furrow	cellular_component	membrane part	12	1222	54	21212	0.222222	4.55449e-05	0.036527
GO:0005791	rough endoplasmic reticulum	cellular_component	organelle	16	1222	91	21212	0.175824	5.79505e-05	0.0464763
GO:0005874	microtubule	cellular_component	organelle	37	1222	325	21212	0.113846	6.17656e-05	0.049536
GO:0001725	stress fiber	cellular_component	organelle	14	1222	73	21212	0.191781	6.21967e-05	0.0498818
