# Supplementary material for: Characterization of transcriptional landscape in bone marrow-derived mesenchymal stromal cells treated with aspirin by RNA-seq
Source: PeerJ. 2022 Jan 24;10:e12819. doi: 10.7717/peerj.12819 (PMC8793730; doi:10.7717/peerj.12819)
Supplement: Supplemental Information 8 [file peerj-10-12819-s008.xls]

## Sheet: p5vsp20BP
GO_P Term ID	GO_P Term Desc	GO_P Term Level1	GO_P Term Level2	Term Candidate Gene Num	Total Candidate Gene Num	Term Gene Num	Total Gene Num	Rich Ratio	P value	Q value
GO:0016310	phosphorylation	biological_process	cellular process	398	8716	610	20061	0.652459	3.13325e-28	3.11006e-24
GO:0008150	biological_process	biological_process	biological_process	1026	8716	1879	20061	0.546035	1.31563e-24	1.3059e-20
GO:0006468	protein phosphorylation	biological_process	cellular process	387	8716	631	20061	0.613312	3.61194e-20	3.58521e-16
GO:0015031	protein transport	biological_process	localization	298	8716	470	20061	0.634043	1.06803e-18	1.06013e-14
GO:0006974	cellular response to DNA damage stimulus	biological_process	cellular process	232	8716	359	20061	0.64624	3.07934e-16	3.05655e-12
GO:0030335	positive regulation of cell migration	biological_process	regulation of biological process	160	8716	233	20061	0.686695	4.96086e-15	4.92415e-11
GO:0008285	negative regulation of cell proliferation	biological_process	regulation of biological process	232	8716	365	20061	0.635616	4.98283e-15	4.94595e-11
GO:0045893	positive regulation of transcription, DNA-templated	biological_process	metabolic process	355	8716	605	20061	0.586777	1.57959e-14	1.56791e-10
GO:0043065	positive regulation of apoptotic process	biological_process	regulation of biological process	217	8716	341	20061	0.636364	3.1683e-14	3.14485e-10
GO:0010976	positive regulation of neuron projection development	biological_process	developmental process	119	8716	164	20061	0.72561	3.27742e-14	3.25317e-10
GO:0001934	positive regulation of protein phosphorylation	biological_process	metabolic process	131	8716	193	20061	0.678756	5.34277e-12	5.30323e-08
GO:0006470	protein dephosphorylation	biological_process	cellular process	119	8716	172	20061	0.69186	6.9187e-12	6.8675e-08
GO:0006886	intracellular protein transport	biological_process	localization	202	8716	328	20061	0.615854	2.13806e-11	2.12224e-07
GO:0000278	mitotic cell cycle	biological_process	cellular process	96	8716	134	20061	0.716418	3.25136e-11	3.2273e-07
GO:0001525	angiogenesis	biological_process	developmental process	128	8716	191	20061	0.670157	3.61488e-11	3.58813e-07
GO:0090263	positive regulation of canonical Wnt signaling pathway	biological_process	cellular process	69	8716	89	20061	0.775281	5.39646e-11	5.35652e-07
GO:0006915	apoptotic process	biological_process	cellular process	269	8716	464	20061	0.579741	1.43868e-10	1.42803e-06
GO:0048661	positive regulation of smooth muscle cell proliferation	biological_process	regulation of biological process	62	8716	79	20061	0.78481	2.05826e-10	2.04303e-06
GO:0007030	Golgi organization	biological_process	cellular process	75	8716	101	20061	0.742574	2.96758e-10	2.94562e-06
GO:0016567	protein ubiquitination	biological_process	cellular process	270	8716	471	20061	0.573248	6.4683e-10	6.42044e-06
GO:0007420	brain development	biological_process	developmental process	194	8716	323	20061	0.600619	1.07875e-09	1.07077e-05
GO:0002040	sprouting angiogenesis	biological_process	developmental process	28	8716	29	20061	0.965517	1.19983e-09	1.19095e-05
GO:0000122	negative regulation of transcription by RNA polymerase II	biological_process	negative regulation of biological process	464	8716	870	20061	0.533333	1.34466e-09	1.33471e-05
GO:0006281	DNA repair	biological_process	response to stimulus	167	8716	272	20061	0.613971	1.5821e-09	1.57039e-05
GO:0051726	regulation of cell cycle	biological_process	regulation of biological process	98	8716	144	20061	0.680556	1.97178e-09	1.95719e-05
GO:0032436	positive regulation of proteasomal ubiquitin-dependent protein catabolic process	biological_process	metabolic process	55	8716	70	20061	0.785714	2.01589e-09	2.00097e-05
GO:0008360	regulation of cell shape	biological_process	developmental process	90	8716	131	20061	0.687023	4.27601e-09	4.24437e-05
GO:0043066	negative regulation of apoptotic process	biological_process	regulation of biological process	313	8716	565	20061	0.553982	4.75772e-09	4.72252e-05
GO:0016477	cell migration	biological_process	locomotion	135	8716	214	20061	0.630841	4.9423e-09	4.90573e-05
GO:0007528	neuromuscular junction development	biological_process	cellular process	28	8716	30	20061	0.933333	1.04675e-08	0.0001039
GO:0016311	dephosphorylation	biological_process	metabolic process	110	8716	169	20061	0.650888	1.05095e-08	0.000104318
GO:0051301	cell division	biological_process	cellular process	156	8716	256	20061	0.609375	1.13081e-08	0.000112244
GO:0032869	cellular response to insulin stimulus	biological_process	response to stimulus	96	8716	144	20061	0.666667	1.47828e-08	0.000146734
GO:0010629	negative regulation of gene expression	biological_process	metabolic process	154	8716	253	20061	0.608696	1.55834e-08	0.00015468
GO:0045944	positive regulation of transcription by RNA polymerase II	biological_process	metabolic process	583	8716	1137	20061	0.512753	2.85039e-08	0.000282929
GO:0014070	response to organic cyclic compound	biological_process	response to stimulus	165	8716	276	20061	0.597826	2.92306e-08	0.000290143
GO:0001666	response to hypoxia	biological_process	response to stimulus	167	8716	280	20061	0.596429	3.0366e-08	0.000301413
GO:0007049	cell cycle	biological_process	cellular process	218	8716	383	20061	0.569191	6.14033e-08	0.000609489
GO:0045892	negative regulation of transcription, DNA-templated	biological_process	regulation of biological process	316	8716	582	20061	0.542955	6.19004e-08	0.000614423
GO:0018108	peptidyl-tyrosine phosphorylation	biological_process	metabolic process	81	8716	120	20061	0.675	8.49177e-08	0.000842894
GO:0008284	positive regulation of cell proliferation	biological_process	positive regulation of biological process	304	8716	560	20061	0.542857	1.12363e-07	0.00111531
GO:0030199	collagen fibril organization	biological_process	cellular process	35	8716	42	20061	0.833333	1.21074e-07	0.00120178
GO:0071456	cellular response to hypoxia	biological_process	cellular process	97	8716	150	20061	0.646667	1.2236e-07	0.00121455
GO:0036120	cellular response to platelet-derived growth factor stimulus	biological_process	response to stimulus	29	8716	33	20061	0.878788	1.44218e-07	0.00143151
GO:0045669	positive regulation of osteoblast differentiation	biological_process	developmental process	49	8716	65	20061	0.753846	1.627e-07	0.00161496
GO:0035335	peptidyl-tyrosine dephosphorylation	biological_process	metabolic process	68	8716	98	20061	0.693878	1.79766e-07	0.00178436
GO:0042060	wound healing	biological_process	response to stimulus	84	8716	127	20061	0.661417	1.96404e-07	0.0019495
GO:0006511	ubiquitin-dependent protein catabolic process	biological_process	cellular process	163	8716	278	20061	0.586331	2.14477e-07	0.0021289
GO:0006979	response to oxidative stress	biological_process	response to stimulus	94	8716	146	20061	0.643836	2.58446e-07	0.00256534
GO:0030036	actin cytoskeleton organization	biological_process	cellular process	102	8716	161	20061	0.63354	2.64192e-07	0.00262237
GO:0048146	positive regulation of fibroblast proliferation	biological_process	regulation of biological process	48	8716	64	20061	0.75	2.84722e-07	0.00282615
GO:0001837	epithelial to mesenchymal transition	biological_process	developmental process	28	8716	32	20061	0.875	2.93253e-07	0.00291083
GO:0046777	protein autophosphorylation	biological_process	cellular process	114	8716	184	20061	0.619565	3.01029e-07	0.00298802
GO:0010595	positive regulation of endothelial cell migration	biological_process	locomotion	35	8716	43	20061	0.813953	3.77626e-07	0.00374831
GO:0010718	positive regulation of epithelial to mesenchymal transition	biological_process	developmental process	35	8716	43	20061	0.813953	3.77626e-07	0.00374831
GO:0071560	cellular response to transforming growth factor beta stimulus	biological_process	response to stimulus	62	8716	89	20061	0.696629	4.98083e-07	0.00494398
GO:0002931	response to ischemia	biological_process	response to stimulus	44	8716	58	20061	0.758621	5.13528e-07	0.00509728
GO:0000209	protein polyubiquitination	biological_process	metabolic process	85	8716	131	20061	0.648855	5.83144e-07	0.00578828
GO:0048008	platelet-derived growth factor receptor signaling pathway	biological_process	regulation of biological process	27	8716	31	20061	0.870968	5.93851e-07	0.00589457
GO:0009968	negative regulation of signal transduction	biological_process	negative regulation of biological process	68	8716	100	20061	0.68	5.95156e-07	0.00590752
GO:0043547	positive regulation of GTPase activity	biological_process	biological regulation	163	8716	282	20061	0.578014	7.51806e-07	0.00746243
GO:0001701	in utero embryonic development	biological_process	multicellular organismal process	136	8716	229	20061	0.593886	7.83967e-07	0.00778165
GO:0032956	regulation of actin cytoskeleton organization	biological_process	regulation of biological process	46	8716	62	20061	0.741935	8.59084e-07	0.00852726
GO:0000082	G1/S transition of mitotic cell cycle	biological_process	cellular process	43	8716	57	20061	0.754386	9.0453e-07	0.00897836
GO:0018105	peptidyl-serine phosphorylation	biological_process	cellular process	94	8716	149	20061	0.630872	1.01016e-06	0.0100269
GO:0035556	intracellular signal transduction	biological_process	regulation of biological process	251	8716	461	20061	0.544469	1.02883e-06	0.0102121
GO:0010628	positive regulation of gene expression	biological_process	positive regulation of biological process	240	8716	439	20061	0.546697	1.16371e-06	0.011551
GO:0006897	endocytosis	biological_process	localization	102	8716	165	20061	0.618182	1.43776e-06	0.0142712
GO:0016055	Wnt signaling pathway	biological_process	biological regulation	102	8716	165	20061	0.618182	1.43776e-06	0.0142712
GO:0032355	response to estradiol	biological_process	response to stimulus	134	8716	227	20061	0.590308	1.49486e-06	0.014838
GO:0030308	negative regulation of cell growth	biological_process	regulation of biological process	79	8716	122	20061	0.647541	1.62477e-06	0.0161275
GO:0009612	response to mechanical stimulus	biological_process	response to stimulus	73	8716	111	20061	0.657658	1.68305e-06	0.0167059
GO:0031175	neuron projection development	biological_process	developmental process	99	8716	160	20061	0.61875	1.92187e-06	0.0190765
GO:0006260	DNA replication	biological_process	metabolic process	70	8716	106	20061	0.660377	2.18005e-06	0.0216391
GO:0006888	ER to Golgi vesicle-mediated transport	biological_process	localization	77	8716	119	20061	0.647059	2.28676e-06	0.0226984
GO:0007399	nervous system development	biological_process	developmental process	182	8716	324	20061	0.561728	2.35319e-06	0.0233578
GO:0045444	fat cell differentiation	biological_process	developmental process	52	8716	74	20061	0.702703	2.7182e-06	0.0269809
GO:0032570	response to progesterone	biological_process	response to stimulus	48	8716	67	20061	0.716418	2.72103e-06	0.0270089
GO:0071407	cellular response to organic cyclic compound	biological_process	cellular process	74	8716	114	20061	0.649123	2.99858e-06	0.0297639
GO:0007507	heart development	biological_process	multicellular organismal process	146	8716	253	20061	0.577075	3.14003e-06	0.031168
GO:0007568	aging	biological_process	developmental process	202	8716	366	20061	0.551913	3.44188e-06	0.0341641
GO:0042127	regulation of cell proliferation	biological_process	regulation of biological process	105	8716	173	20061	0.606936	3.45134e-06	0.034258
GO:0030324	lung development	biological_process	developmental process	77	8716	120	20061	0.641667	3.67478e-06	0.0364759
GO:0030326	embryonic limb morphogenesis	biological_process	developmental process	40	8716	54	20061	0.740741	4.78367e-06	0.0474827
GO:0016126	sterol biosynthetic process	biological_process	metabolic process	22	8716	25	20061	0.88	4.93334e-06	0.0489683
GO:0061003	positive regulation of dendritic spine morphogenesis	biological_process	regulation of biological process	22	8716	25	20061	0.88	4.93334e-06	0.0489683
GO:0001822	kidney development	biological_process	developmental process	92	8716	149	20061	0.61745	4.95811e-06	0.0492142
GO:0005515	protein binding	molecular_function	binding	1139	8164	1777	19033	0.640968	1.27019e-79	4.06842e-76
GO:0000166	nucleotide binding	molecular_function	binding	842	8164	1365	19033	0.61685	1.23871e-47	3.96758e-44
GO:0003674	molecular_function	molecular_function	molecular_function	1319	8164	2351	19033	0.561038	3.68286e-43	1.17962e-39
GO:0016740	transferase activity	molecular_function	catalytic activity	749	8164	1271	19033	0.5893	1.01022e-32	3.23574e-29
GO:0016301	kinase activity	molecular_function	catalytic activity	400	8164	611	19033	0.654664	2.96808e-30	9.50675e-27
GO:0046872	metal ion binding	molecular_function	binding	1419	8164	2714	19033	0.522845	1.45756e-26	4.66855e-23
GO:0005524	ATP binding	molecular_function	binding	887	8164	1611	19033	0.55059	7.70775e-25	2.46879e-21
GO:0019901	protein kinase binding	molecular_function	binding	323	8164	499	19033	0.647295	2.18164e-23	6.98778e-20
GO:0004672	protein kinase activity	molecular_function	catalytic activity	341	8164	551	19033	0.618875	7.45325e-20	2.38728e-16
GO:0042802	identical protein binding	molecular_function	binding	594	8164	1055	19033	0.563033	1.53299e-19	4.91017e-16
GO:0044877	protein-containing complex binding	molecular_function	binding	275	8164	455	19033	0.604396	2.02682e-14	6.4919e-11
GO:0042803	protein homodimerization activity	molecular_function	binding	501	8164	914	19033	0.54814	7.74255e-14	2.47994e-10
GO:0004674	protein serine/threonine kinase activity	molecular_function	catalytic activity	241	8164	394	19033	0.611675	1.33304e-13	4.26973e-10
GO:0005178	integrin binding	molecular_function	binding	89	8164	120	19033	0.741667	3.12824e-12	1.00197e-08
GO:0003676	nucleic acid binding	molecular_function	binding	628	8164	1197	19033	0.524645	3.87508e-12	1.24119e-08
GO:0004721	phosphoprotein phosphatase activity	molecular_function	catalytic activity	86	8164	117	19033	0.735043	1.64358e-11	5.26437e-08
GO:0019899	enzyme binding	molecular_function	binding	258	8164	443	19033	0.582393	3.69574e-11	1.18375e-07
GO:0003824	catalytic activity	molecular_function	catalytic activity	264	8164	455	19033	0.58022	3.77531e-11	1.20923e-07
GO:0004842	ubiquitin-protein transferase activity	molecular_function	catalytic activity	175	8164	285	19033	0.614035	1.88032e-10	6.02265e-07
GO:0031625	ubiquitin protein ligase binding	molecular_function	binding	189	8164	313	19033	0.603834	2.68751e-10	8.60809e-07
GO:0019904	protein domain specific binding	molecular_function	binding	196	8164	329	19033	0.595745	6.31579e-10	2.02295e-06
GO:0008017	microtubule binding	molecular_function	binding	158	8164	259	19033	0.610039	2.7609e-09	8.84317e-06
GO:0016791	phosphatase activity	molecular_function	catalytic activity	90	8164	132	19033	0.681818	3.58077e-09	1.14692e-05
GO:0016787	hydrolase activity	molecular_function	catalytic activity	638	8164	1261	19033	0.505948	7.5157e-09	2.40728e-05
GO:0008134	transcription factor binding	molecular_function	binding	224	8164	393	19033	0.569975	9.5162e-09	3.04804e-05
GO:0003779	actin binding	molecular_function	binding	204	8164	355	19033	0.574648	1.79718e-08	5.75637e-05
GO:0019900	kinase binding	molecular_function	binding	76	8164	110	19033	0.690909	2.38061e-08	7.62509e-05
GO:0016887	ATPase activity	molecular_function	catalytic activity	142	8164	234	19033	0.606838	2.77455e-08	8.88689e-05
GO:0004725	protein tyrosine phosphatase activity	molecular_function	catalytic activity	72	8164	105	19033	0.685714	8.97305e-08	0.000287407
GO:0061630	ubiquitin protein ligase activity	molecular_function	catalytic activity	135	8164	226	19033	0.597345	2.24865e-07	0.000720243
GO:0003713	transcription coactivator activity	molecular_function	transcription regulator activity	130	8164	217	19033	0.599078	2.97413e-07	0.000952615
GO:0008092	cytoskeletal protein binding	molecular_function	binding	66	8164	97	19033	0.680412	4.78574e-07	0.00153287
GO:0003777	microtubule motor activity	molecular_function	catalytic activity	50	8164	69	19033	0.724638	6.03862e-07	0.00193417
GO:0043130	ubiquitin binding	molecular_function	binding	51	8164	71	19033	0.71831	7.29099e-07	0.0023353
GO:0019838	growth factor binding	molecular_function	binding	35	8164	44	19033	0.795455	7.41593e-07	0.00237532
GO:0051536	iron-sulfur cluster binding	molecular_function	binding	38	8164	49	19033	0.77551	8.0516e-07	0.00257893
GO:0046332	SMAD binding	molecular_function	binding	42	8164	56	19033	0.75	1.04961e-06	0.00336188
GO:0048365	Rac GTPase binding	molecular_function	binding	38	8164	50	19033	0.76	1.96432e-06	0.0062917
GO:0051015	actin filament binding	molecular_function	binding	121	8164	205	19033	0.590244	2.19824e-06	0.00704097
GO:0017048	Rho GTPase binding	molecular_function	binding	34	8164	44	19033	0.772727	3.57866e-06	0.0114625
GO:0003682	chromatin binding	molecular_function	binding	262	8164	496	19033	0.528226	4.17946e-06	0.0133868
GO:0005096	GTPase activator activity	molecular_function	molecular function regulator	141	8164	247	19033	0.57085	4.44033e-06	0.0142224
GO:0008270	zinc ion binding	molecular_function	binding	420	8164	833	19033	0.504202	4.68381e-06	0.0150022
GO:0017147	Wnt-protein binding	molecular_function	binding	30	8164	38	19033	0.789474	6.25523e-06	0.0200355
GO:0046982	protein heterodimerization activity	molecular_function	binding	313	8164	607	19033	0.515651	7.71054e-06	0.0246969
GO:0016874	ligase activity	molecular_function	catalytic activity	70	8164	110	19033	0.636364	8.95925e-06	0.0286965
GO:0008022	protein C-terminus binding	molecular_function	binding	138	8164	244	19033	0.565574	1.07734e-05	0.0345071
GO:0004714	transmembrane receptor protein tyrosine kinase activity	molecular_function	catalytic activity	40	8164	56	19033	0.714286	1.43071e-05	0.0458256
GO:0008565	protein transporter activity	molecular_function	transporter activity	40	8164	56	19033	0.714286	1.43071e-05	0.0458256
GO:0005737	cytoplasm	cellular_component	cell	3226	9049	5897	21212	0.547058	8.63724e-107	1.29991e-103
GO:0005829	cytosol	cellular_component	cell part	2010	9049	3521	21212	0.570861	2.15411e-79	3.24193e-76
GO:0005634	nucleus	cellular_component	cell part	3175	9049	6070	21212	0.523064	4.78823e-72	7.20628e-69
GO:0005654	nucleoplasm	cellular_component	cell part	1205	9049	2140	21212	0.563084	5.47727e-41	8.24329e-38
GO:0005856	cytoskeleton	cellular_component	organelle	498	9049	754	21212	0.660477	1.16397e-39	1.75178e-36
GO:0005575	cellular_component	cellular_component	cellular_component	1138	9049	2069	21212	0.550024	1.05139e-32	1.58234e-29
GO:0005794	Golgi apparatus	cellular_component	cell part	666	9049	1116	21212	0.596774	6.32185e-32	9.51438e-29
GO:0005813	centrosome	cellular_component	cell	333	9049	503	21212	0.662028	4.47923e-27	6.74124e-24
GO:0005783	endoplasmic reticulum	cellular_component	cell	722	9049	1276	21212	0.565831	4.57971e-25	6.89246e-22
GO:0042995	cell projection	cellular_component	cell part	346	9049	551	21212	0.627949	4.79031e-22	7.20942e-19
GO:0048471	perinuclear region of cytoplasm	cellular_component	cell	428	9049	726	21212	0.589532	2.07378e-19	3.12105e-16
GO:0005739	mitochondrion	cellular_component	organelle	791	9049	1476	21212	0.535908	1.37123e-18	2.0637e-15
GO:0032991	protein-containing complex	cellular_component	protein-containing complex	449	9049	781	21212	0.574904	1.53935e-17	2.31673e-14
GO:0098978	glutamatergic synapse	cellular_component	synapse	291	9049	474	21212	0.613924	8.6601e-17	1.30335e-13
GO:0005768	endosome	cellular_component	cell	278	9049	453	21212	0.613687	4.55861e-16	6.86071e-13
GO:0005815	microtubule organizing center	cellular_component	organelle	167	9049	248	21212	0.673387	2.85372e-15	4.29485e-12
GO:0031410	cytoplasmic vesicle	cellular_component	cell part	316	9049	533	21212	0.592871	4.14012e-15	6.23089e-12
GO:0043231	intracellular membrane-bounded organelle	cellular_component	cell part	461	9049	825	21212	0.558788	4.88629e-15	7.35387e-12
GO:0005730	nucleolus	cellular_component	organelle	457	9049	820	21212	0.557317	1.16129e-14	1.74774e-11
GO:0030027	lamellipodium	cellular_component	cell part	121	9049	170	21212	0.711765	4.15394e-14	6.25167e-11
GO:0005769	early endosome	cellular_component	organelle	164	9049	249	21212	0.658635	1.0063e-13	1.51448e-10
GO:0005874	microtubule	cellular_component	organelle	203	9049	325	21212	0.624615	3.67671e-13	5.53345e-10
GO:0000139	Golgi membrane	cellular_component	membrane	240	9049	397	21212	0.604534	4.76039e-13	7.16438e-10
GO:0005789	endoplasmic reticulum membrane	cellular_component	membrane	386	9049	709	21212	0.544429	9.3341e-11	1.40478e-07
GO:0005819	spindle	cellular_component	cell part	98	9049	141	21212	0.695035	9.65269e-11	1.45273e-07
GO:0030425	dendrite	cellular_component	cell part	321	9049	576	21212	0.557292	1.11962e-10	1.68502e-07
GO:0014069	postsynaptic density	cellular_component	organelle	206	9049	348	21212	0.591954	2.98067e-10	4.4859e-07
GO:0015629	actin cytoskeleton	cellular_component	organelle	121	9049	185	21212	0.654054	3.26081e-10	4.90752e-07
GO:0043197	dendritic spine	cellular_component	cell	131	9049	205	21212	0.639024	6.23635e-10	9.38571e-07
GO:0043025	neuronal cell body	cellular_component	cell part	339	9049	620	21212	0.546774	6.83668e-10	1.02892e-06
GO:0000776	kinetochore	cellular_component	cell part	74	9049	102	21212	0.72549	8.65083e-10	1.30195e-06
GO:0030424	axon	cellular_component	cell part	261	9049	462	21212	0.564935	1.05111e-09	1.58192e-06
GO:0043005	neuron projection	cellular_component	cell part	300	9049	542	21212	0.553506	1.20637e-09	1.81559e-06
GO:0005871	kinesin complex	cellular_component	organelle	46	9049	56	21212	0.821429	1.47901e-09	2.22591e-06
GO:0005901	caveola	cellular_component	membrane	67	9049	91	21212	0.736264	1.93609e-09	2.91381e-06
GO:0010008	endosome membrane	cellular_component	membrane	81	9049	118	21212	0.686441	9.94086e-09	1.4961e-05
GO:0009986	cell surface	cellular_component	cell part	325	9049	604	21212	0.538079	1.48769e-08	2.23898e-05
GO:0030496	midbody	cellular_component	cell part	104	9049	161	21212	0.645963	1.51662e-08	2.28251e-05
GO:0045202	synapse	cellular_component	synapse	337	9049	630	21212	0.534921	1.84569e-08	2.77777e-05
GO:0005741	mitochondrial outer membrane	cellular_component	organelle	93	9049	141	21212	0.659574	1.88942e-08	2.84357e-05
GO:0062023	collagen-containing extracellular matrix	cellular_component	extracellular region part	72	9049	103	21212	0.699029	1.97418e-08	2.97114e-05
GO:0042470	melanosome	cellular_component	organelle	69	9049	98	21212	0.704082	2.43448e-08	3.6639e-05
GO:0016529	sarcoplasmic reticulum	cellular_component	organelle	44	9049	56	21212	0.785714	4.42664e-08	6.6621e-05
GO:0000502	proteasome complex	cellular_component	protein-containing complex	48	9049	63	21212	0.761905	6.24317e-08	9.39597e-05
GO:0031965	nuclear membrane	cellular_component	cell part	140	9049	234	21212	0.598291	8.12117e-08	0.000122224
GO:0005905	clathrin-coated pit	cellular_component	membrane	43	9049	55	21212	0.781818	8.21409e-08	0.000123622
GO:0016604	nuclear body	cellular_component	cell part	165	9049	284	21212	0.580986	9.97543e-08	0.00015013
GO:0030426	growth cone	cellular_component	cell part	109	9049	176	21212	0.619318	1.86461e-07	0.000280623
GO:0098793	presynapse	cellular_component	cell part	91	9049	142	21212	0.640845	2.03257e-07	0.000305902
GO:0005925	focal adhesion	cellular_component	cell junction	127	9049	212	21212	0.599057	2.87996e-07	0.000433435
GO:0035861	site of double-strand break	cellular_component	organelle	39	9049	50	21212	0.78	3.71268e-07	0.000558759
GO:0030175	filopodium	cellular_component	cell	57	9049	81	21212	0.703704	4.08398e-07	0.00061464
GO:0031252	cell leading edge	cellular_component	cell part	46	9049	62	21212	0.741935	4.57259e-07	0.000688174
GO:0001726	ruffle	cellular_component	cell part	63	9049	92	21212	0.684783	4.86822e-07	0.000732667
GO:0000785	chromatin	cellular_component	cell	85	9049	133	21212	0.639098	6.0145e-07	0.000905182
GO:0044297	cell body	cellular_component	cell part	74	9049	113	21212	0.654867	7.92661e-07	0.00119296
GO:0030315	T-tubule	cellular_component	membrane	45	9049	61	21212	0.737705	8.0243e-07	0.00120766
GO:0005911	cell-cell junction	cellular_component	cell junction	105	9049	172	21212	0.610465	8.47258e-07	0.00127512
GO:0005814	centriole	cellular_component	organelle	77	9049	119	21212	0.647059	9.7779e-07	0.00147157
GO:0000775	chromosome, centromeric region	cellular_component	organelle	59	9049	86	21212	0.686047	1.01329e-06	0.001525
GO:0005764	lysosome	cellular_component	organelle	183	9049	329	21212	0.556231	1.27811e-06	0.00192356
GO:0001650	fibrillar center	cellular_component	cell	82	9049	129	21212	0.635659	1.3065e-06	0.00196629
GO:0045121	membrane raft	cellular_component	membrane part	167	9049	297	21212	0.56229	1.50056e-06	0.00225834
GO:0030054	cell junction	cellular_component	cell junction	340	9049	659	21212	0.515933	1.70616e-06	0.00256776
GO:0015630	microtubule cytoskeleton	cellular_component	organelle	106	9049	176	21212	0.602273	1.87737e-06	0.00282545
GO:0043209	myelin sheath	cellular_component	cell	116	9049	196	21212	0.591837	2.16044e-06	0.00325146
GO:0001725	stress fiber	cellular_component	organelle	51	9049	73	21212	0.69863	2.3357e-06	0.00351523
GO:0031012	extracellular matrix	cellular_component	extracellular region	147	9049	260	21212	0.565385	4.11137e-06	0.00618761
GO:0005802	trans-Golgi network	cellular_component	organelle	97	9049	161	21212	0.602484	4.92959e-06	0.00741903
GO:0022624	proteasome accessory complex	cellular_component	cell part	17	9049	18	21212	0.944444	5.47285e-06	0.00823663
GO:0031594	neuromuscular junction	cellular_component	synapse	60	9049	91	21212	0.659341	6.1614e-06	0.0092729
GO:0000922	spindle pole	cellular_component	organelle	78	9049	125	21212	0.624	6.56133e-06	0.0098748
GO:0042383	sarcolemma	cellular_component	membrane	82	9049	133	21212	0.616541	7.53883e-06	0.0113459
GO:0045171	intercellular bridge	cellular_component	extracellular region part	38	9049	52	21212	0.730769	8.44404e-06	0.0127083
GO:0005884	actin filament	cellular_component	organelle	58	9049	88	21212	0.659091	8.91381e-06	0.0134153
GO:0030176	integral component of endoplasmic reticulum membrane	cellular_component	organelle	67	9049	105	21212	0.638095	9.79219e-06	0.0147373
GO:0043235	receptor complex	cellular_component	protein-containing complex	116	9049	201	21212	0.577114	1.14437e-05	0.0172227
GO:0005876	spindle microtubule	cellular_component	organelle	27	9049	34	21212	0.794118	1.34886e-05	0.0203003
GO:0030134	COPII-coated ER to Golgi transport vesicle	cellular_component	organelle	27	9049	34	21212	0.794118	1.34886e-05	0.0203003
GO:0031982	vesicle	cellular_component	organelle	81	9049	133	21212	0.609023	1.64649e-05	0.0247796
GO:0005912	adherens junction	cellular_component	cell junction	50	9049	75	21212	0.666667	2.28732e-05	0.0344242
