# Supplementary material for: Characterization of transcriptional landscape in bone marrow-derived mesenchymal stromal cells treated with aspirin by RNA-seq
Source: PeerJ. 2022 Jan 24;10:e12819. doi: 10.7717/peerj.12819 (PMC8793730; doi:10.7717/peerj.12819)
Supplement: Supplemental Information 9 [file peerj-10-12819-s009.xls]

## Sheet: p20vsp20+ABP
GO_P Term ID	GO_P Term Desc	GO_P Term Level1	GO_P Term Level2	Term Candidate Gene Num	Total Candidate Gene Num	Term Gene Num	Total Gene Num	Rich Ratio	P value	Q value
GO:0051592	response to calcium ion	biological_process	response to stimulus	16	440	92	20061	0.173913	1.49978e-10	3.94892e-07
GO:0030198	extracellular matrix organization	biological_process	cellular process	17	440	119	20061	0.142857	9.70563e-10	2.55549e-06
GO:0032355	response to estradiol	biological_process	response to stimulus	23	440	227	20061	0.101322	1.21813e-09	3.20732e-06
GO:0001525	angiogenesis	biological_process	developmental process	21	440	191	20061	0.109948	1.46683e-09	3.86217e-06
GO:0009612	response to mechanical stimulus	biological_process	response to stimulus	16	440	111	20061	0.144144	2.65054e-09	6.97887e-06
GO:0010033	response to organic substance	biological_process	response to stimulus	18	440	157	20061	0.11465	1.135e-08	2.98845e-05
GO:0008284	positive regulation of cell proliferation	biological_process	regulation of biological process	35	440	560	20061	0.0625	3.06439e-08	8.06854e-05
GO:0009611	response to wounding	biological_process	response to stimulus	13	440	87	20061	0.149425	5.34298e-08	0.000140681
GO:0007155	cell adhesion	biological_process	biological adhesion	31	440	487	20061	0.063655	1.28953e-07	0.000339532
GO:0008285	negative regulation of cell proliferation	biological_process	regulation of biological process	26	440	365	20061	0.0712329	1.58471e-07	0.000417255
GO:0045766	positive regulation of angiogenesis	biological_process	developmental process	15	440	132	20061	0.113636	2.13558e-07	0.000562299
GO:0030199	collagen fibril organization	biological_process	cellular process	9	440	42	20061	0.214286	2.54046e-07	0.000668904
GO:0007584	response to nutrient	biological_process	response to stimulus	15	440	144	20061	0.104167	6.65711e-07	0.00175282
GO:0042060	wound healing	biological_process	response to stimulus	14	440	127	20061	0.110236	7.87827e-07	0.00207435
GO:0031100	animal organ regeneration	biological_process	developmental process	12	440	100	20061	0.12	1.9608e-06	0.00516278
GO:0050731	positive regulation of peptidyl-tyrosine phosphorylation	biological_process	metabolic process	11	440	92	20061	0.119565	5.43384e-06	0.0143073
GO:0007599	hemostasis	biological_process	biological regulation	7	440	33	20061	0.212121	6.07189e-06	0.0159873
GO:0042493	response to drug	biological_process	response to stimulus	30	440	556	20061	0.0539568	6.16522e-06	0.016233
GO:0042127	regulation of cell proliferation	biological_process	regulation of biological process	15	440	173	20061	0.0867052	6.66849e-06	0.0175581
GO:0071320	cellular response to cAMP	biological_process	response to stimulus	10	440	77	20061	0.12987	6.87169e-06	0.0180931
GO:0042472	inner ear morphogenesis	biological_process	developmental process	9	440	62	20061	0.145161	7.84229e-06	0.0206488
GO:0043066	negative regulation of apoptotic process	biological_process	negative regulation of biological process	30	440	565	20061	0.0530973	8.43085e-06	0.0221984
GO:0014070	response to organic cyclic compound	biological_process	response to stimulus	19	440	276	20061	0.0688406	1.21454e-05	0.0319787
GO:0010629	negative regulation of gene expression	biological_process	metabolic process	18	440	253	20061	0.0711462	1.31659e-05	0.0346658
GO:0001666	response to hypoxia	biological_process	response to stimulus	19	440	280	20061	0.0678571	1.48706e-05	0.0391542
GO:0032354	response to follicle-stimulating hormone	biological_process	response to stimulus	4	440	8	20061	0.5	1.49021e-05	0.0392371
GO:0032570	response to progesterone	biological_process	response to stimulus	9	440	67	20061	0.134328	1.5005e-05	0.0395081
GO:0001889	liver development	biological_process	developmental process	13	440	143	20061	0.0909091	1.64646e-05	0.0433512
GO:0008201	heparin binding	molecular_function	binding	19	417	150	19033	0.126667	7.88095e-10	5.69005e-07
GO:0005509	calcium ion binding	molecular_function	binding	44	417	732	19033	0.0601093	1.42678e-09	1.03013e-06
GO:0005515	protein binding	molecular_function	binding	75	417	1777	19033	0.042206	2.12566e-08	1.53473e-05
GO:0005178	integrin binding	molecular_function	binding	14	417	120	19033	0.116667	3.83359e-07	0.000276785
GO:0019838	growth factor binding	molecular_function	binding	9	417	44	19033	0.204545	3.83597e-07	0.000276957
GO:0005539	glycosaminoglycan binding	molecular_function	binding	7	417	26	19033	0.269231	1.05753e-06	0.000763534
GO:0050840	extracellular matrix binding	molecular_function	binding	7	417	31	19033	0.225806	3.84577e-06	0.00277665
GO:0005201	extracellular matrix structural constituent	molecular_function	structural molecule activity	9	417	61	19033	0.147541	6.753e-06	0.00487567
GO:0005198	structural molecule activity	molecular_function	structural molecule activity	18	417	254	19033	0.0708661	1.35573e-05	0.00978839
GO:0017147	Wnt-protein binding	molecular_function	binding	7	417	38	19033	0.184211	1.61706e-05	0.0116752
GO:0005544	calcium-dependent phospholipid binding	molecular_function	binding	8	417	59	19033	0.135593	4.14102e-05	0.0298981
GO:0017048	Rho GTPase binding	molecular_function	binding	7	417	44	19033	0.159091	4.38482e-05	0.0316584
GO:0005615	extracellular space	cellular_component	extracellular region part	100	447	1433	21212	0.0697837	3.83401e-27	1.55277e-24
GO:0005576	extracellular region	cellular_component	extracellular region	89	447	1524	21212	0.058399	7.13346e-19	2.88905e-16
GO:0031012	extracellular matrix	cellular_component	extracellular region	32	447	260	21212	0.123077	9.23343e-16	3.73954e-13
GO:0062023	collagen-containing extracellular matrix	cellular_component	extracellular region part	19	447	103	21212	0.184466	4.67297e-13	1.89255e-10
GO:0009986	cell surface	cellular_component	cell part	43	447	604	21212	0.0711921	3.45574e-12	1.39958e-09
GO:0005737	cytoplasm	cellular_component	cell part	186	447	5897	21212	0.0315415	1.57827e-10	6.39199e-08
GO:0005604	basement membrane	cellular_component	extracellular region part	17	447	111	21212	0.153153	1.74608e-10	7.07164e-08
GO:0043235	receptor complex	cellular_component	protein-containing complex	18	447	201	21212	0.0895522	2.84221e-07	0.000115109
GO:0045121	membrane raft	cellular_component	membrane	22	447	297	21212	0.0740741	3.87445e-07	0.000156915
GO:0005886	plasma membrane	cellular_component	membrane	154	447	5217	21212	0.0295189	1.50935e-06	0.000611285
GO:0005925	focal adhesion	cellular_component	cell junction	16	447	212	21212	0.0754717	1.18433e-05	0.00479652
GO:0005856	cytoskeleton	cellular_component	organelle	35	447	754	21212	0.0464191	1.19127e-05	0.00482464
GO:0005887	integral component of plasma membrane	cellular_component	membrane	40	447	1001	21212	0.03996	8.52101e-05	0.0345101
GO:0042383	sarcolemma	cellular_component	membrane	11	447	133	21212	0.0827068	0.000121111	0.0490499
