# Supplementary material for: Characterization of transcriptional landscape in bone marrow-derived mesenchymal stromal cells treated with aspirin by RNA-seq
Source: PeerJ. 2022 Jan 24;10:e12819. doi: 10.7717/peerj.12819 (PMC8793730; doi:10.7717/peerj.12819)
Supplement: Supplemental Information 14 [file peerj-10-12819-s014.xlsx]

## Sheet: Sheet1
	EP BMSCs	EP BMSCs+ASA	LP BMSCs	LP BMSCs+ASA
blue stained cell number	15	14	90	84
	13	15	86	75
	13	13	95	79
