# Supplementary material for: Characterization of transcriptional landscape in bone marrow-derived mesenchymal stromal cells treated with aspirin by RNA-seq
Source: PeerJ. 2022 Jan 24;10:e12819. doi: 10.7717/peerj.12819 (PMC8793730; doi:10.7717/peerj.12819)
Supplement: Supplemental Information 15 [file peerj-10-12819-s015.xlsx]

## Sheet: Sheet1
	p16			p21			p53
EP BMSCs	1.21982	0.97041	0.844791	1.09429	1.08673	0.840896	1.07923	0.993092	0.933033
EP BMSCs+ASA	0.941696	0.860551	1.00231	0.730353	0.761368	0.782773	0.937354	1.09177	1.07674
LP BMSCs	3.18215	2.71321	4.14106	1.43727	1.41748	1.22547	2.25532	2.06098	2.16345
LP BMSCs+ASA	2.20381	2.44528	2.9897	1.10445	1.17555	1.18372	1.69741	1.81924	1.83189
