# Supplementary material for: Characterization of transcriptional landscape in bone marrow-derived mesenchymal stromal cells treated with aspirin by RNA-seq
Source: PeerJ. 2022 Jan 24;10:e12819. doi: 10.7717/peerj.12819 (PMC8793730; doi:10.7717/peerj.12819)
Supplement: Supplemental Information 23 [file peerj-10-12819-s023.xlsx]

## Sheet: Sheet1
	p5 vs p20			p5 vs p5+A			p20 vs p20+A
Scd	0.963707	5.86989		0.963707	0.716978		1.10701	0.777366
	1.04006	5.59188		1.04006	0.757858		1.05458	0.766664
	0.997692	4.54202		0.997692	0.752623		0.856584	0.82169
Sirt1	0.897095	2.01391		0.897095	0.786399		0.993092	1.02337
	0.974905	2.31338		0.974905	0.808508		1.14076	1.07425
	1.1434	1.79005		1.1434	0.770215		0.882703	1.09682
Pla2g2a	0.993092	3.00355		0.993092	0.681444		1.11729	0.692555
	1.00696	2.84153		1.00696	0.730353		1.05702	0.752623
	1	1.94082		1	0.740549		0.846745	0.752623
hdac9	0.974905	2.57279					0.884745	0.844791
	0.652176	3.10229					1.06683	0.777366
	1.5728	3.44221					1.05946	0.844791
