# Supplementary material for: Characterization of transcriptional landscape in bone marrow-derived mesenchymal stromal cells treated with aspirin by RNA-seq
Source: PeerJ. 2022 Jan 24;10:e12819. doi: 10.7717/peerj.12819 (PMC8793730; doi:10.7717/peerj.12819)
Supplement: Supplemental Information 24 [file peerj-10-12819-s024.xlsx]

## Sheet: Sheet1
Sirt1 F	GCAGGTTGCAGGAATCCAAA
Sirt1 R	TGGCTTCATGATGGCAAGTG
Scd F	TCCAGTTCCTACACGACCAC
Scd R	CCTCCTCATCCTGGTAGCTG
Hdac9 F	AAGCCTCGTTTTCGGTAACAT
Hdac9 R	GGCAGAATCCTCGGTCAGTAG
Pla2g2a F	AGAGCTGACAGCATGAAGGT
Pla2g2a R	CAATCTGTGGCATCCTTGGG
