# Supplementary material for: Characterization of transcriptional landscape in bone marrow-derived mesenchymal stromal cells treated with aspirin by RNA-seq
Source: PeerJ journal article supplement (doi:10.7717/peerj.12819), 2022-01-24

Aspirin (400  $\mu$ mol/L)

-

+

SA- $\beta$ -Gal

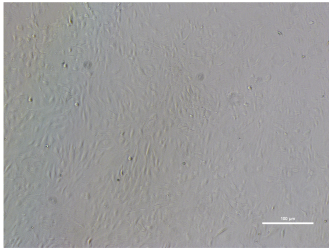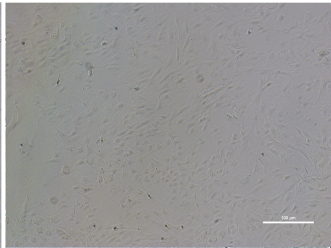

Supplement: Supplementaryfigure1.pdf [file Supplementaryfigure1.pdf]
