# Supplementary material for: Characterization of transcriptional landscape in bone marrow-derived mesenchymal stromal cells treated with aspirin by RNA-seq
Source: PeerJ journal article supplement (doi:10.7717/peerj.12819), 2022-01-24

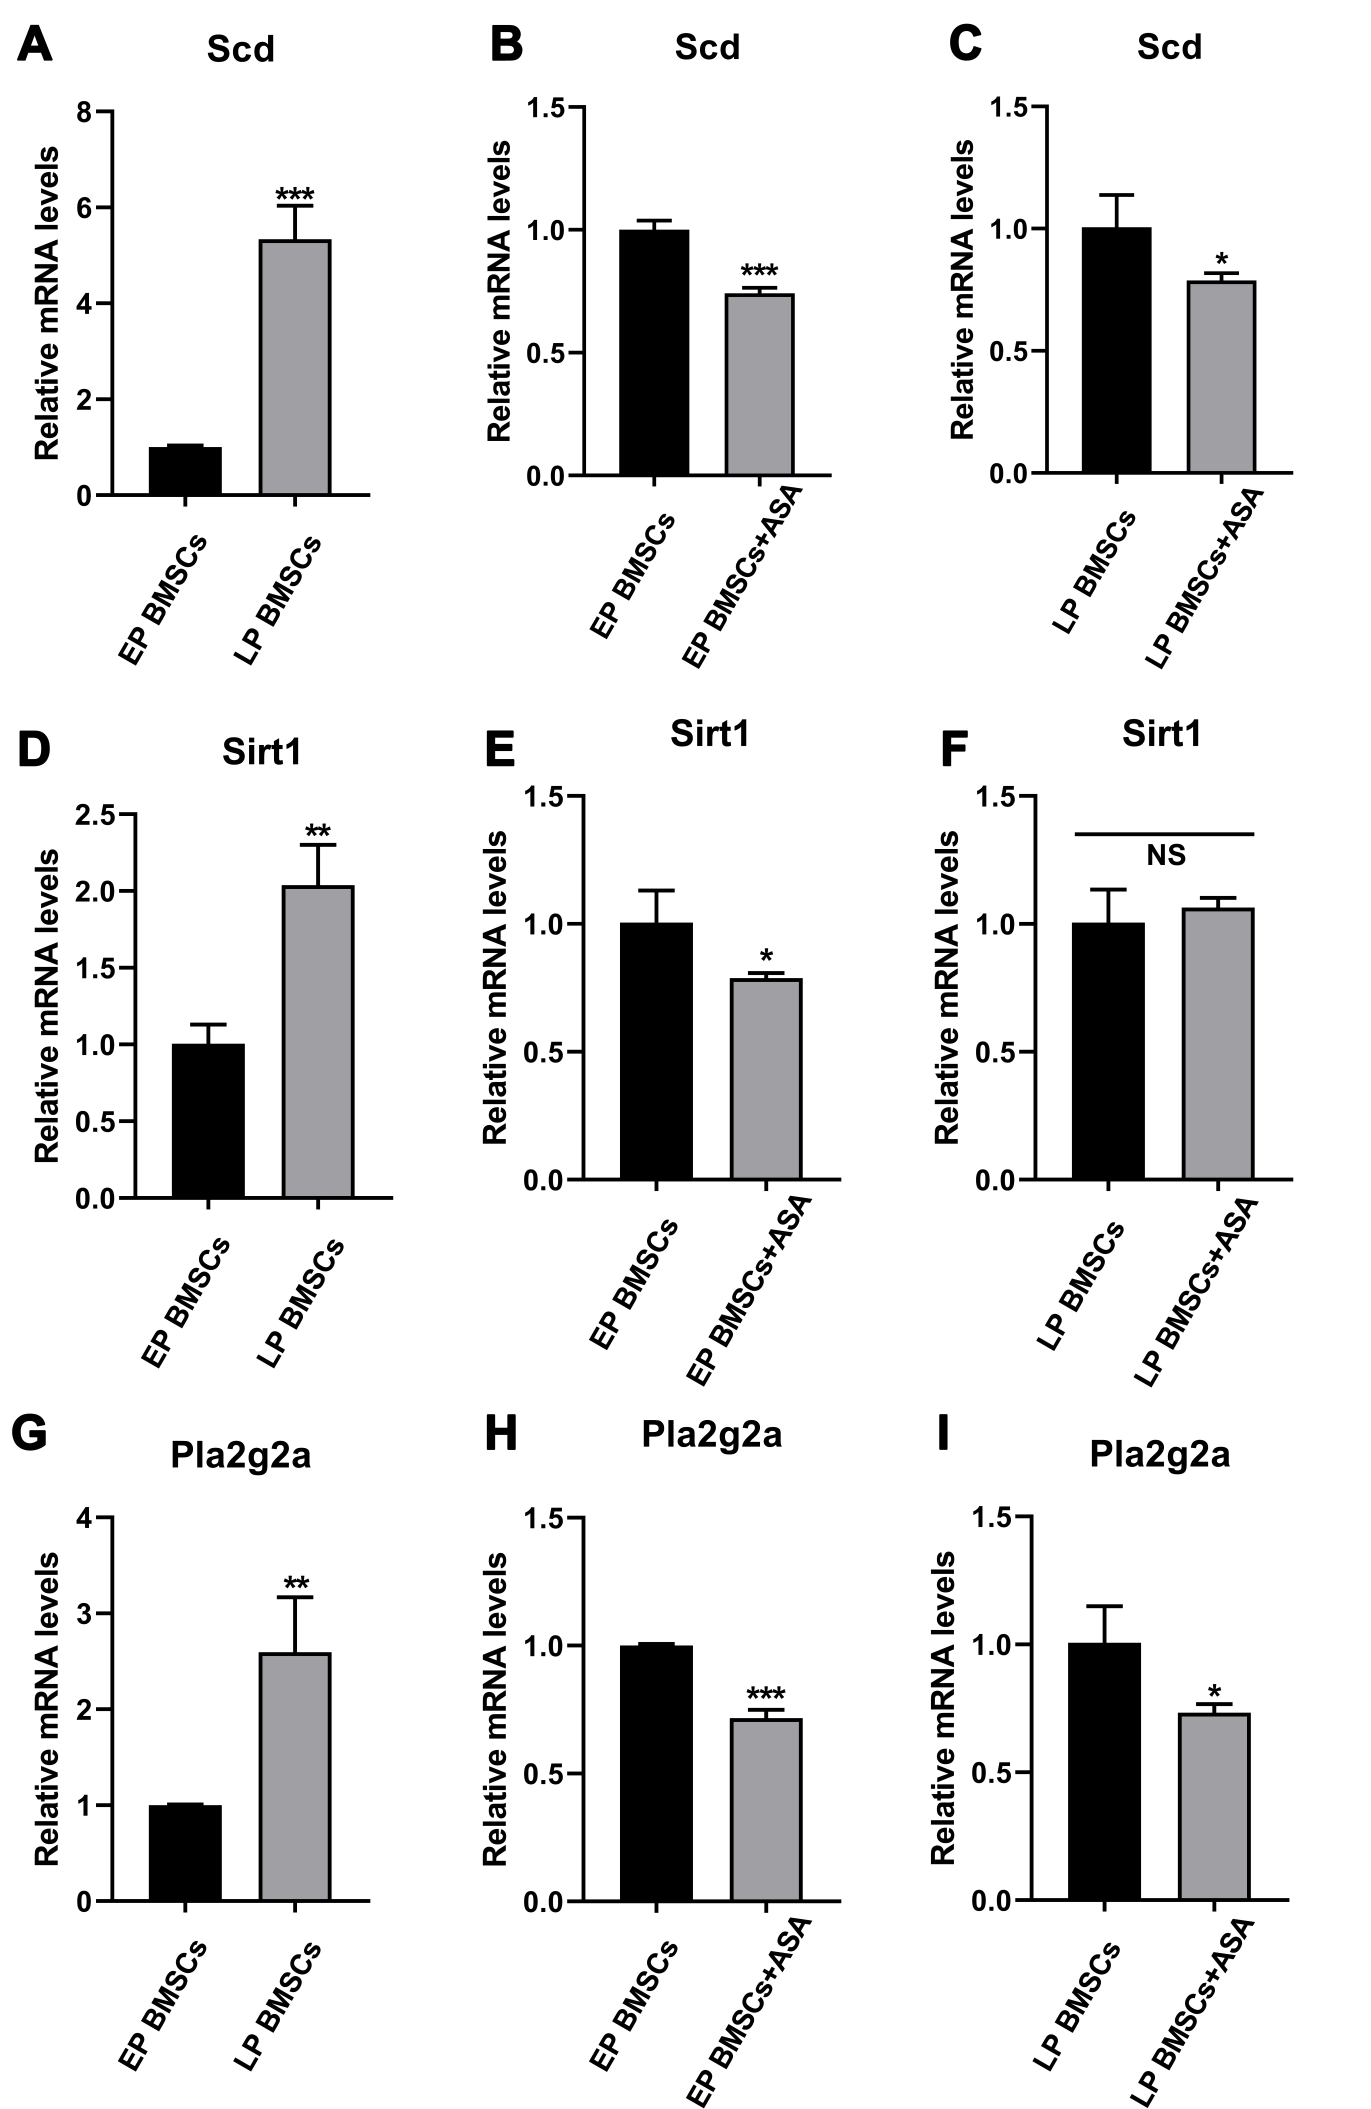

Supplement: Supplementaryfigure2.pdf [file Supplementaryfigure2.pdf]
