# Supplementary material for: Characterization of transcriptional landscape in bone marrow-derived mesenchymal stromal cells treated with aspirin by RNA-seq
Source: PeerJ journal article supplement (doi:10.7717/peerj.12819), 2022-01-24

**A****Hdac 9**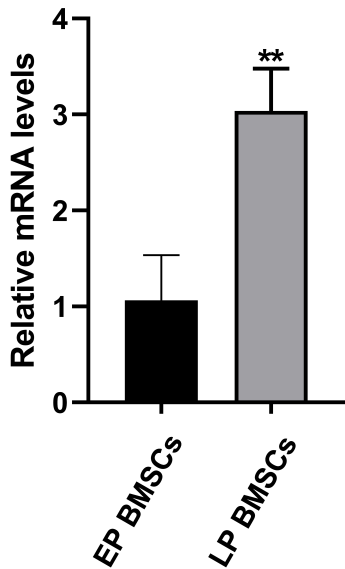**B****Hdac 9**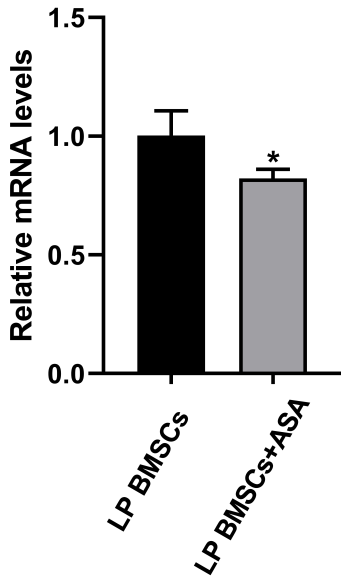

Supplement: Supplementaryfigure3.pdf [file Supplementaryfigure3.pdf]
